# Supplementary material for: Factors influencing long-term heart failure mortality in patients with obstructive hypertrophic cardiomyopathy in Western Sweden: probable dose-related protection from beta-blocker therapy
Source: PubMed Central journal article supplement — Open Heart. 2019 Jun 27;6(1):e000963. doi: 10.1136/openhrt-2018-000963 (PMC6609122; doi:10.1136/openhrt-2018-000963), 2019-06-27
Supplement: openhrt-2018-000963supp001.pdf [file openhrt-2018-000963supp001.pdf]

Supplementary Figure S1. Flow chart of the total HOCM cohort

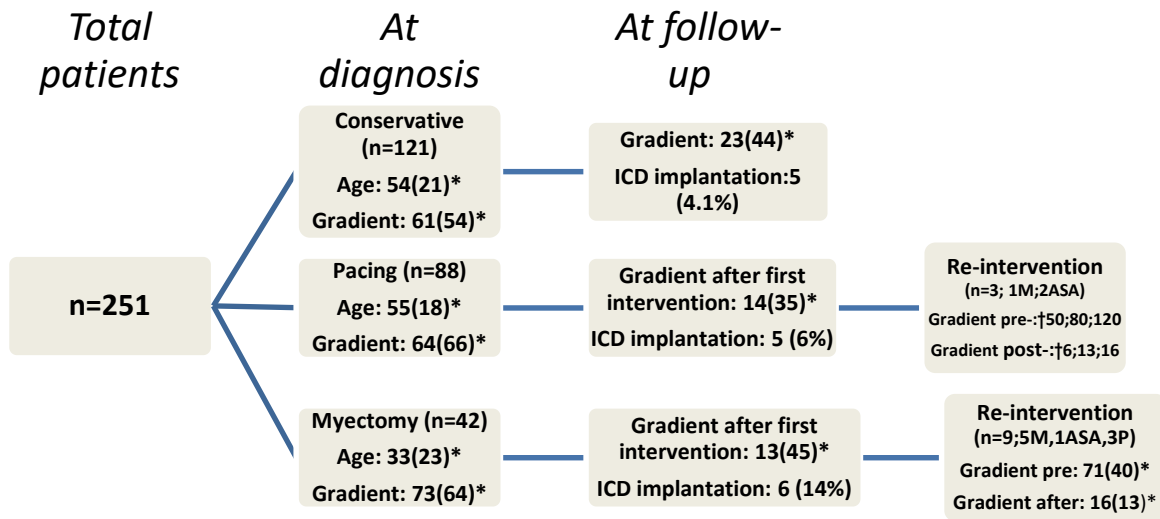

Flow chart: \*= Median (IQR), †= individual value, M= Myectomy, ASA= Alcohol septal ablation, P=Pacing

Suppl. Figure S2

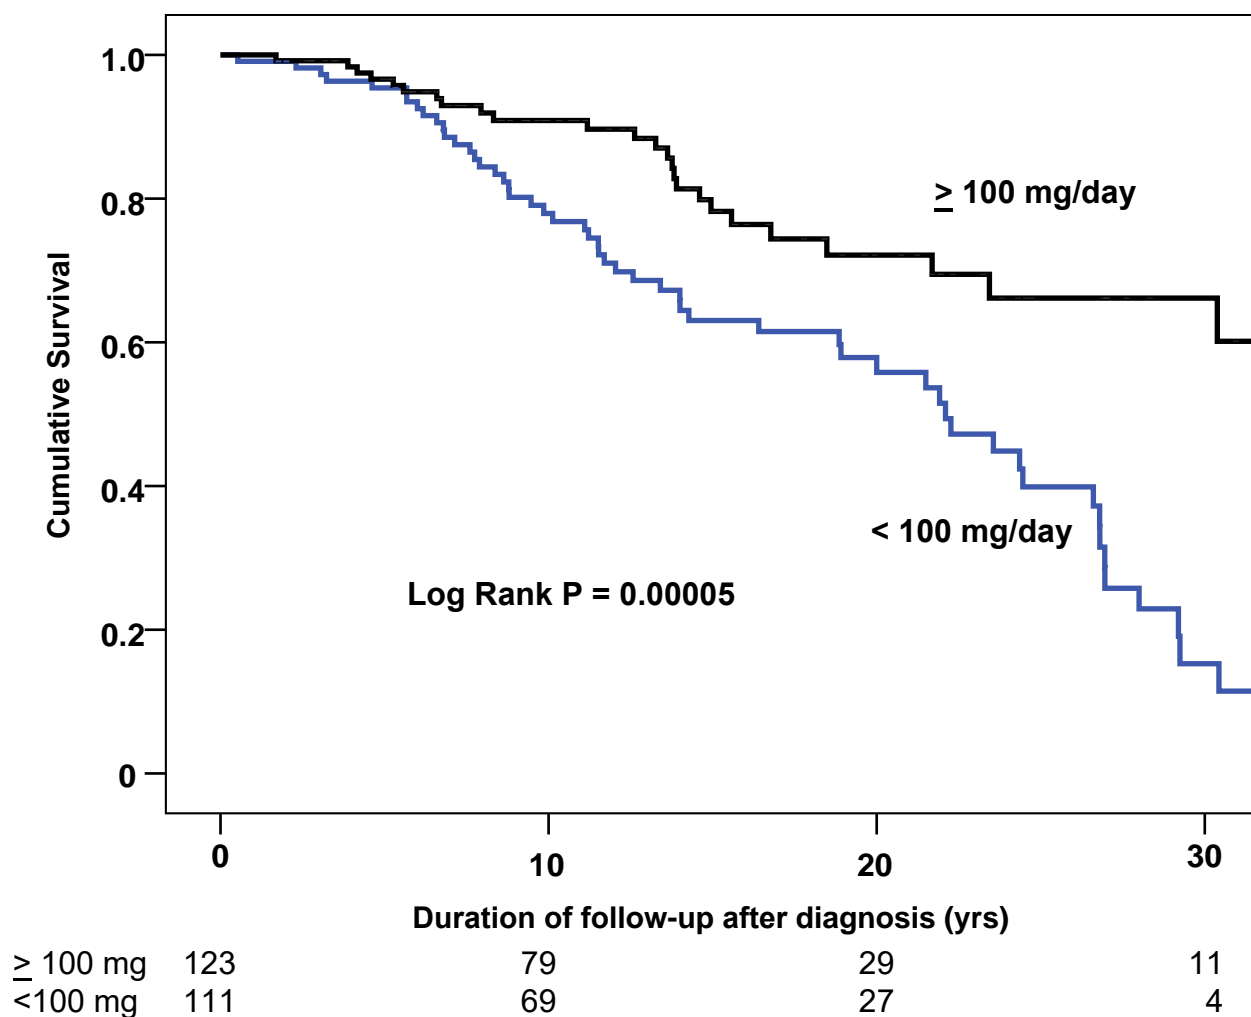

Supplementary Figure S2. Kaplan-Meier survival curves with all-cause mortality, according to daily dose of metoprolol equivalents

Figure S3

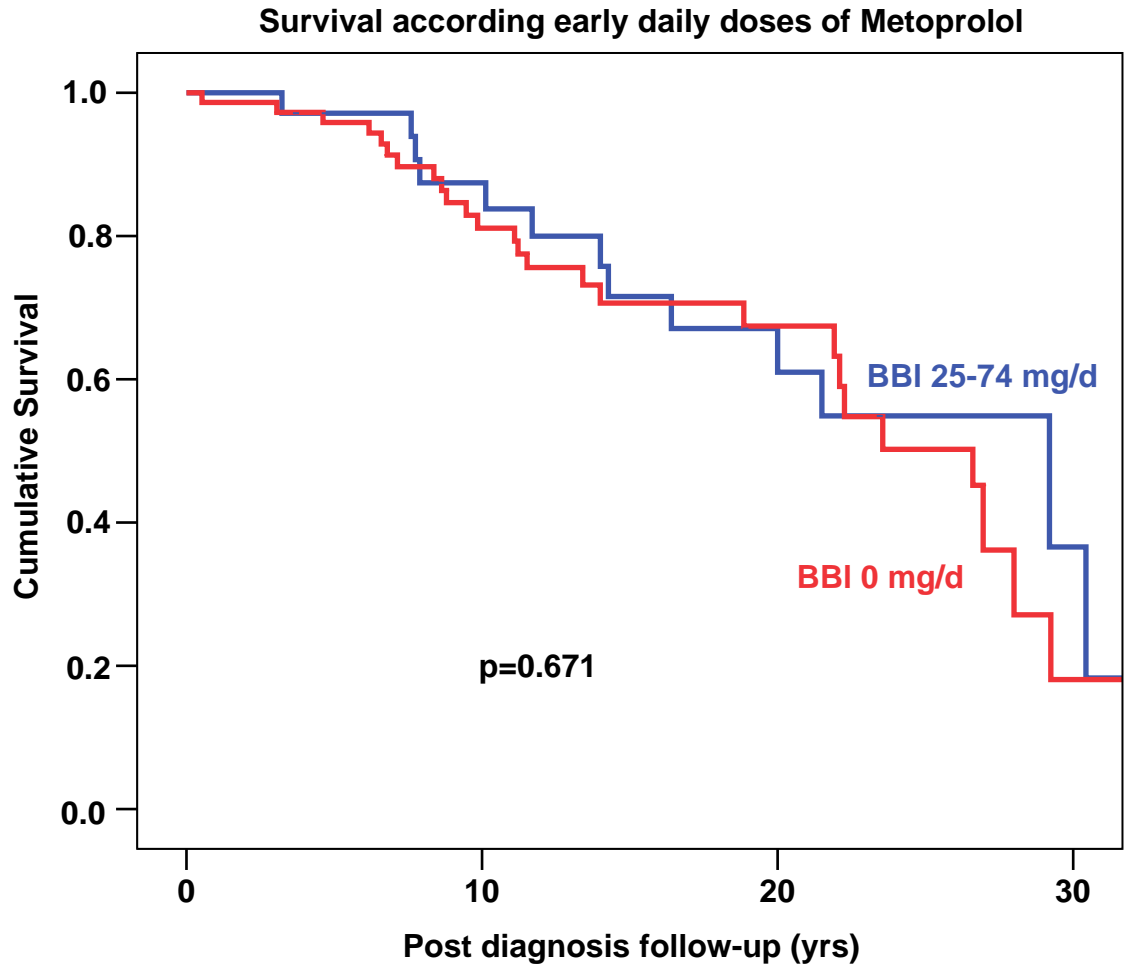

Supplementary Figure S3. Kaplan-Meier survival curves showing freedom from disease-related death in patients according to treatment started at the time of diagnosis. Patients receiving no beta-blockers at all are shown in red, and those receiving low doses of 25-74 mg/kgBW/day in metoprolol-equivalents are shown in blue.

## SUPPLEMENTARY FILES

| <b>Supplementary Table S1 Medical therapy split between treatment groups</b> |                               |                               |                        |                          |                                 |                                    |                                   |
|------------------------------------------------------------------------------|-------------------------------|-------------------------------|------------------------|--------------------------|---------------------------------|------------------------------------|-----------------------------------|
| <b>Group</b>                                                                 | <i>Total cohort<br/>n=251</i> | <i>Conservative<br/>n=121</i> | <i>Pacing<br/>n=88</i> | <i>Myectomy<br/>n=42</i> | <i>Con v<br/>PM<br/>p-value</i> | <i>Con v<br/>Myect<br/>p-value</i> | <i>PM v<br/>Myect<br/>p-value</i> |
| <b>Therapy at diagnosis:</b>                                                 |                               |                               |                        |                          |                                 |                                    |                                   |
| Beta-blockers use (%)                                                        | 71.3                          | 72.7                          | 67.0                   | 76.2                     | 0.36                            | 0.84                               | 0.39                              |
| Verapamil/diltiazem use (%)                                                  | 12.4                          | 11.6                          | 15.9                   | 7.0                      | 0.45                            | 0.41                               | 0.18                              |
| <b>Therapy at latest FU:<br/>Yes vs No</b>                                   |                               |                               |                        |                          |                                 |                                    |                                   |
| Beta-blocker use (%)                                                         | 86.1                          | 87.6                          | 85.2                   | 83.3                     | 1.0                             | 0.62                               | 0.79                              |
| Verapamil/diltiazem use (%)                                                  | 12.7                          | 12.4                          | 17.0                   | 4.8                      | 0.34                            | 0.24                               | 0.057                             |
| Any calcium-blocker use (%)                                                  | 31.9                          | 23.1                          | 48.9                   | 23.8                     | <b>&lt;0.001</b>                | 0.95                               | <b>0.005</b>                      |
| Amiodarone use (%)                                                           | 11.8                          | 13.2                          | 10.3                   | 11.9                     | 0.56                            | 0.85                               | 0.79                              |
| Disopyramide use (%)                                                         | 11.8                          | 12.2                          | 6.9                    | 20.9                     | 0.21                            | 0.16                               | 0.18                              |
| ACE-inhibitor use (%)                                                        | 25.5                          | 28.1                          | 22.7                   | 23.8                     | 0.49                            | 0.61                               | 0.97                              |
| Spironolacton use (%)                                                        | 15.5                          | 14.0                          | 18.2                   | 14.3                     | 0.34                            | 0.95                               | 0.52                              |

**Abbreviations:** Con=Conservative=only medical therapy, PM=pacemaker, Myect= Myectomy, FU=follow up, Calcium-channel blockers (inclusive Verapamil, Felodipine, Amlodipine, Nifedipine, Diltiazem). P-value= Mann-Whitney/Chi-square/Fisher exact test used as appropriate.

**Supplementary Table S2: Risk-factors/protective factors at diagnosis for total mortality on Cox hazard regression**

| <i>Variable</i>                         | <i>B</i>      | <i>SE</i> | <i>Exp(B)</i> | <i>95% CI Exp(B)</i> | <i>p-value</i>   |
|-----------------------------------------|---------------|-----------|---------------|----------------------|------------------|
| <b>Univariate Cox hazard analysis</b>   |               |           |               |                      |                  |
| Female sex                              | 0.812         | 0.221     | 2.253         | 1.461-3.474          | <b>&lt;0.001</b> |
| Age at diagnosis                        | 0.055         | 0.008     | 1.057         | 1.041-1.073          | <b>&lt;0.001</b> |
| NYHA class ≥III vs ≤II                  | 0.236         | 0.213     | 1.266         | 0.834-1.922          | 0.267            |
| Body mass index                         | -0.045        | 0.028     | 0.956         | 0.906-1.009          | 0.105            |
| Systemic hypertension Yes vs No         | 0.368         | 0.326     | 1.445         | 0.762-2.739          | 0.259            |
| Diabetes mellitus Yes vs No             | 0.783         | 0.373     | 2.188         | 1.053-4.544          | <b>0.036</b>     |
| Coronary artery disease Yes vs No       | 1.469         | 0.434     | 4.343         | 1.855-10.167         | <b>0.001</b>     |
| Atrial fibrillation Yes vs No           | 0.431         | 0.721     | 1.539         | 0.375-6.320          | 0.550            |
| Chronic kidney disease                  | 0.330         | 0.728     | 1.392         | 0.334-5.792          | 0.650            |
| Chronic Obstructive Pulmonary Disease   | 0.624         | 0.337     | 1.866         | 0.965-3.609          | 0.064            |
| Family history of SCD Yes vs No         | 0.297         | 0.183     | 1.346         | 0.941-1.926          | 0.104            |
| History of syncope Yes vs No            | 0.212         | 0.132     | 1.236         | 0.954-1.602          | 0.109            |
| History of chest pain Yes vs No         | -0.004        | 0.107     | 0.996         | 0.807-1.228          | 0.967            |
| Septum (mm)                             | -0.033        | 0.024     | 0.968         | 0.923-1.015          | 0.174            |
| Septum:cavity ratio                     | -1.528        | 0.935     | 0.217         | 0.035-1.357          | 0.102            |
| Left Ventricle wall:cavity ratio        | -1.336        | 1.504     | 0.263         | 0.014-5.016          | 0.375            |
| Max.wall thickness (mm)                 | -0.032        | 0.024     | 0.969         | 0.924-1.016          | 0.187            |
| Max.wall thickness ≥30 vs <30mm         | 0.591         | 0.716     | 1.806         | 0.444-7.355          | 0.409            |
| Left Ventricle posterior wall (mm)      | -0.002        | 0.040     | 0.998         | 0.922-1.080          | 0.961            |
| Initial LVEDD                           | 0.008         | 0.014     | 1.008         | 0.980-1.037          | 0.566            |
| Initial Ejection Fraction (%)           | -0.675        | 0.951     | 0.509         | 0.079-3.285          | 0.478            |
| Left Atrium diameter (mm)               | 0.015         | 0.014     | 1.016         | 0.989-1.043          | 0.258            |
| LVOT gradient at rest (mmHg)            | 0.002         | 0.003     | 1.002         | 0.997-1.007          | 0.402            |
| LVOT-gradient at rest ≥30 vs <30 (mmHg) | 0.570         | 0.301     | 1.767         | 0.979-3.190          | 0.059            |
| LVOT-gradient at rest ≥50 vs <50 (mmHg) | 0.561         | 0.239     | 1.752         | 1.096-2.799          | <b>0.019</b>     |
| 12-lead QRS product                     | 0.003         | 0.105     | 1.003         | 0.816-1.233          | 0.974            |
| Sokolow -Lyon index (mm)                | 0.007         | 0.006     | 1.007         | 0.996-1.018          | 0.200            |
| QRS-duration (ms)                       | 0.004         | 0.004     | 1.004         | 0.995-1.013          | 0.368            |
| QTC (ms)                                | 0.007         | 0.003     | 1.007         | 1.002-1.012          | <b>0.009</b>     |
| Beta-blocker Yes vs No                  | <b>-0.785</b> | 0.215     | 0.456         | 0.299-0.696          | <b>&lt;0.001</b> |
| Beta-blocker dose mg/day                | <b>-0.006</b> | 0.001     | 0.994         | 0.991-0.997          | <b>&lt;0.001</b> |
| Beta-blocker ≥100mg vs <100mg           | <b>-0.925</b> | 0.235     | 0.397         | 0.250-0.628          | <b>&lt;0.001</b> |
| Verapamil,Diltiazem use Yes vs No       | 1.115         | 0.252     | 3.051         | 1.863-4.995          | <b>&lt;0.001</b> |
| Verapamil,Diltiazem daily dose, mg/day  | 0.004         | 0.001     | 1.004         | 1.002-1.006          | <b>&lt;0.001</b> |
| Statin treatment Yes vs No              | -0.624        | 0.402     | 0.536         | 0.244-1.179          | 0.121            |
| <b>Multivariate Cox hazard analysis</b> |               |           |               |                      |                  |
| Female sex                              | 0.805         | 0.252     | 2.237         | 1.367-3.663          | <b>0.001</b>     |
| Age                                     | 0.050         | 0.008     | 1.051         | 1.035-1.068          | <b>&lt;0.001</b> |
| LVOT-gradient at rest ≥50 vs <50 (mmHg) | 0.708         | 0.257     | 2.029         | 1.226-3.58           | <b>0.006</b>     |
| Beta-blocker dose mg/day                | -0.003        | 0.001     | 0.997         | 0.995-1.000          | 0.064            |

**Abbreviations:** NYHA=New York Heart Association Class, SCD=Sudden Cardiac Death, LVEDD= Left Ventricle End Diastolic Diameter, LVOT=Left Ventricular outflow tract. Significant negative values of B suggest reduction in risk

**Supplementary Table S3: Risk-factors/protective factors at diagnosis for heart failure death on Cox hazard regression**

| <b>Variable</b>                         | <b>B</b>      | <b>SE</b> | <b>Exp(B)</b> | <b>95% CI Exp(B)</b> | <b>p-value</b>   |
|-----------------------------------------|---------------|-----------|---------------|----------------------|------------------|
| <b>Univariate Cox hazard analysis</b>   |               |           |               |                      |                  |
| Female sex                              | 0.752         | 0.328     | 2.121         | 1.116-4.034          | <b>0.022</b>     |
| Age at diagnosis                        | 0.065         | 0.013     | 1.067         | 1.041-1.094          | <b>&lt;0.001</b> |
| NYHA class ≥III vs ≤II                  | 0.323         | 0.320     | 1.382         | 0.739-2.586          | 0.312            |
| Body mass index                         | 0.009         | 0.046     | 1.009         | 0.922-1.105          | 0.842            |
| Systemic hypertension Yes vs No         | 0.488         | 0.488     | 1.629         | 0.626-4.241          | 0.317            |
| Diabetes mellitus Yes Vs No             | 0.268         | 0.731     | 1.307         | 0.312-5.471          | 0.714            |
| Coronary artery disease Yes vs No       | 0.537         | 1.025     | 1.710         | 0.230-12.742         | 0.600            |
| Atrial fibrillation Yes vs No           | 0.840         | 0.734     | 2.316         | 0.550-9.760          | 0.252            |
| Chronic kidney disease                  | 0.238         | 1.036     | 1.269         | 0.166-9.671          | 0.818            |
| Chronic Obstructive Pulmonary Disease   | 0.740         | 0.481     | 2.097         | 0.817-5.384          | 0.124            |
| Family history of SCD Yes vs No         | 0.100         | 0.236     | 1.105         | 0.697-1.753          | 0.670            |
| History of syncope Yes vs No            | 0.151         | 0.195     | 1.163         | 0.794-1.704          | 0.439            |
| History of chest pain Yes vs No         | 0.089         | 0.164     | 1.093         | 0.792-1.508          | 0.587            |
| Septum (mm)                             | -0.024        | 0.036     | 0.976         | 0.909-1.048          | 0.508            |
| Septum:cavity ratio                     | -0.411        | 1.411     | 0.663         | 0.042-10.535         | 0.771            |
| Left ventricle wall:cavity ratio        | 1.319         | 2.109     | 3.738         | 0.060-233.099        | 0.532            |
| Max.wall thickness (mm)                 | -0.024        | 0.036     | 0.976         | 0.909-1.048          | 0.504            |
| Max.wall thickness ≥30 vs <30mm         | -0.314        | 0.729     | 0.730         | 0.175-3.050          | 0.666            |
| Left ventricle posterior wall (mm)      | 0.001         | 0.063     | 1.001         | 0.884-1.132          | 0.991            |
| Initial LVEDD                           | -0.006        | 0.021     | 0.994         | 0.954-1.037          | 0.787            |
| Initial Ejection Fraction (%)           | -1.641        | 1.403     | 0.194         | 0.012-3.032          | 0.242            |
| Left atrium diameter (mm)               | -0.008        | 0.022     | 0.992         | 0.951-1.035          | 0.712            |
| LVOT gradient at rest (mmHg)            | 0.002         | 0.004     | 1.002         | 0.995-1.010          | 0.554            |
| LVOT-gradient at rest ≥30 vs <30 (mmHg) | 0.738         | 0.480     | 2.092         | 0.817-5.357          | 0.124            |
| LVOT-gradient at rest ≥50 vs <50 (mmHg) | 0.514         | 0.355     | 1.672         | 0.833-3.356          | 0.148            |
| 12-lead QRS product                     | 0.009         | 0.157     | 1.009         | 0.742-1.373          | 0.954            |
| Sokolow -Lyon index (mm)                | 0.009         | 0.008     | 1.009         | 0.994-1.026          | 0.246            |
| QRS-duration (ms)                       | 0.005         | 0.007     | 1.005         | 0.991-1.018          | 0.483            |
| QTC (ms)                                | 0.007         | 0.004     | 1.007         | 0.999-1.016          | 0.096            |
| Beta-blocker Yes vs No                  | <b>-0.813</b> | 0.326     | 0.443         | 0.234-0.840          | <b>0.013</b>     |
| Beta-blocker dose mg/day                | <b>-0.008</b> | 0.003     | 0.992         | 0.986-0.992          | <b>0.002</b>     |
| Beta-blocker ≥100mg vs <100mg           | <b>-1.187</b> | 0.375     | 0.305         | 0.146-0.636          | <b>0.002</b>     |
| Verapamil,Diltiazem use Yes vs No       | 0.940         | 0.408     | 2.561         | 1.151-5.699          | <b>0.021</b>     |
| Verapamil,Diltiazem daily dose, mg/day  | 0.004         | 0.002     | 1.004         | 1.001-1.007          | <b>0.008</b>     |
| Statin treatment Yes vs No              | -0.035        | 0.153     | 0.966         | 0.716-1.303          | 0.819            |

**Abbreviations:** NYHA=New York Heart Association Class, SCD=Sudden Cardiac Death, LVEDD= Left Ventricle End Diastolic Diameter, LVOT=Left Ventricular outflow tract. Significant negative values of B suggest reduction in risk.

**Supplementary Table S4: Characterization and co-morbidity at diagnosis according to early beta-blocker dose, as median (IQR) unless otherwise specified (n=234, in 17 patients initial dose unknown).**

|                                           | 0-99 mg<br>(n=111) | ≥100mg<br>(n=123) | P-value   |
|-------------------------------------------|--------------------|-------------------|-----------|
| Female (%)<br>Male (%)                    | 55<br>45           | 43<br>57          | 0.070 F/M |
| Age at diagnosis                          | 60 (25)            | 52 (32)           | <0.001    |
| NYHA class (Mean±SD)                      | 2.2 (0.76)         | 2.1 (0.76)        | 0.90      |
| NYHA class ≥III (%)                       | 40                 | 41                | 0.90      |
| LVOT-gradient(mm Hg)                      | 65 (50)            | 58 (66)           | 0.30      |
| LVOT ≥50 mmHg (%)                         | 70                 | 59                | 0.076     |
| Max wall thickness                        | 19 (6)             | 20 (6)            | 0.41      |
| Body mass index                           | 26 (5)             | 26 (7)            | 0.555     |
| Systemic hypertension (%)                 | 15.3               | 11.4              | 0.442     |
| Atrial fibrillation (%)                   | 0.9                | 0.8               | 1.000     |
| Statin therapy (%)                        | 5.4                | 10.6              | 0.15      |
| Diabetes mellitus (%)                     | 6.3                | 4.9               | 0.63      |
| Coronary artery disease (%)               | 4.5                | 2.4               | 0.48      |
| Chronic kidney disease (%)                | 1.8                | 0.8               | 0.61      |
| Chronic pulmonary obstructive disease (%) | 7.2                | 7.3               | 0.96      |

**Abbreviations:** IQR=interquartile range, NYHA=New York Heart Association Class. LVOT= Left Ventricular Outflow Tract, P-value= Mann-Whitney/Chi-square/Fisher exact test used as appropriate.

**Supplementary Table S5: Predictive-factors/protective factors at latest follow-up for heart failure death on Cox hazard regression**

| <i>Variable</i>                         | <i>B</i>      | <i>SE</i> | <i>Exp(B)</i> | <i>95% CI Exp(B)</i> | <i>p-value</i>   |
|-----------------------------------------|---------------|-----------|---------------|----------------------|------------------|
| <b>Univariate Cox hazard analysis</b>   |               |           |               |                      |                  |
| Female sex                              | 0.752         | 0.328     | 2.121         | 1.116-4.034          | <b>0.022</b>     |
| Age                                     | 0.034         | 0.011     | 1.035         | 1.012-1.057          | <b>0.002</b>     |
| NYHA class ≥III vs ≤II                  | 0.554         | 0.462     | 1.740         | 0.704-4.304          | 0.230            |
| Body mass index                         | 0.000         | 0.014     | 1.000         | 0.973-1.028          | 0.997            |
| Systemic hypertension Yes vs No         | 0.772         | 0.318     | 2.164         | 1.160-4.038          | <b>0.015</b>     |
| Diabetes mellitus Yes Vs No             | 0.219         | 0.532     | 1.245         | 0.439-3.533          | 0.680            |
| Coronary artery disease Yes vs No       | 0.173         | 0.445     | 1.189         | 0.497-2.842          | 0.697            |
| Atrial fibrillation Yes vs No           | 0.263         | 0.321     | 1.301         | 0.693-2.443          | 0.412            |
| Chronic kidney disease                  | 0.507         | 0.741     | 1.659         | 0.389-7.088          | 0.494            |
| Chronic Obstructive Pulmonary Disease   | 0.774         | 0.446     | 2.168         | 0.905-5.194          | 0.083            |
| Septum (mm)                             | -0.053        | 0.042     | 0.948         | 0.873-1.030          | 0.208            |
| Septum:cavity ratio                     | 1.903         | 1.610     | 6.722         | 0.286-157.840        | 0.237            |
| Left ventricle wall:cavity ratio        | 1.802         | 1.267     | 6.060         | 0.506-72.600         | 0.155            |
| Max.wall thickness (mm)                 | -0.012        | 0.041     | 0.988         | 0.912-1.070          | 0.761            |
| Left ventricle posterior wall (mm)      | 0.068         | 0.066     | 1.071         | 0.940-1.219          | 0.303            |
| LVEDD                                   | -0.041        | 0.028     | 0.960         | 0.908-1.015          | 0.149            |
| Ejection Fraction (%)                   | 0.200         | 1.239     | 1.221         | 0.108-13.851         | 0.872            |
| Left atrium diameter (mm)               | -0.009        | 0.028     | 0.991         | 0.938-1.047          | 0.742            |
| LVOT gradient at rest (mmHg)            | 0.012         | 0.004     | 1.012         | 1.004-1.019          | <b>0.002</b>     |
| LVOT-gradient at rest ≥30 vs <30 (mmHg) | 0.021         | 0.006     | 1.022         | 1.009-1.034          | <b>0.001</b>     |
| LVOT-gradient at rest ≥50 vs <50 (mmHg) | 0.021         | 0.006     | 1.022         | 1.009-1.034          | <b>&lt;0.001</b> |
| 12-lead QRS product                     | -3.215        | 3.795     | 0.040         | 0.000-68.231         | 0.397            |
| Sokolow -Lyon index (mm)                | -0.537        | 0.960     | 0.584         | 0.089-3.839          | 0.576            |
| QRS-duration (ms)                       | -1.26         | 1.21      | 0.000         | 0.000-9.652          | 0.301            |
| QTC (ms)                                | -0.042        | 0.035     | 0.959         | 0.894-1.028          | 0.234            |
| Myectomy                                | 0.231         | 0.203     | 1.237         | 0.831-1.841          | 0.295            |
| Pacemaker therapy                       | 0.014         | 0.163     | 1.014         | 0.737-1.395          | 0.933            |
| Beta-blocker Yes vs No                  | -0.526        | 0.368     | 0.591         | 0.287-1.216          | 0.153            |
| Beta-blocker dose mg/day                | <b>-0.004</b> | 0.002     | 0.996         | 0.992-0.999          | <b>0.015</b>     |
| Beta-blocker ≥100mg vs <100mg           | <b>-0.648</b> | 0.319     | 0.523         | 0.280-0.977          | <b>0.042</b>     |
| Verapamil,Diltiazem use Yes vs No       | 1.030         | 0.389     | 2.801         | 1.306-6.008          | <b>0.008</b>     |
| Verapamil,Diltiazem daily dose, mg/day  | 0.004         | 0.002     | 1.004         | 1.000-1.007          | <b>0.040</b>     |
| Disopyramide Yes vs No                  | -1.707        | 1.013     | 0.181         | 0.025-1.322          | 0.092            |
| ACE-I Yes vs No                         | -0.241        | 0.162     | 0.786         | 0.572-1.081          | 0.139            |
| Spirolactone Yes vs NO                  | -0.108        | 0.193     | 0.898         | 0.616-1.310          | 0.577            |
| Statin treatment Yes vs No              | -0.833        | 0.528     | 0.435         | 0.154-1.233          | 0.115            |

**Abbreviations:** NYHA=New York Heart Association Class, LVEDD= Left Ventricle End Diastolic Diameter, LVOT=Left Ventricular outflow tract. Significant negative values of B suggest reduction in risk.



**Supplementary Table S6 : Predictor factors/protective factors for total mortality on Cox hazard regression as recorded at latest follow-up**

| <b>Variable</b>                                             | <b>B</b>      | <b>SE</b> | <b>Exp(B)</b> | <b>95% CI expB</b> | <b>P-value</b>   |
|-------------------------------------------------------------|---------------|-----------|---------------|--------------------|------------------|
| <b>Univariate Cox hazard analysis</b>                       |               |           |               |                    |                  |
| Female sex                                                  | 0.812         | 0.221     | 2.253         | 1.461-3.474        | <b>&lt;0.001</b> |
| Age at follow-up                                            | 0.026         | 0.007     | 1.026         | 1.012-1.040        | <b>&lt;0.001</b> |
| NYHA class ≥III vs ≤II                                      | 0.760         | 0.290     | 2.137         | 1.210-3.775        | <b>0.009</b>     |
| Body mass index                                             | 0.000         | 0.004     | 1.000         | 0.991-1.009        | 0.993            |
| Systemic hypertension Yes vs No                             | 0.417         | 0.214     | 1.518         | 0.999-2.308        | 0.051            |
| Diabetes mellitus Yes Vs No                                 | 0.025         | 0.313     | 1.025         | 0.556-1.893        | 0.936            |
| Coronary artery disease Yes vs No                           | 0.546         | 0.265     | 1.726         | 1.027-2.901        | <b>0.039</b>     |
| Chronic kidney disease                                      | 0.074         | 0.432     | 1.077         | 0.462-2.512        | 0.864            |
| Atrial fibrillation Yes vs No                               | 0.389         | 0.213     | 1.475         | 0.972-2.238        | 0.068            |
| Chronic Obstructive Pulmonary Disease                       | 0.537         | 0.323     | 1.710         | 0.908-3.221        | 0.097            |
| Septum (mm)                                                 | 0.017         | 0.027     | 1.017         | 0.966-1.072        | 0.520            |
| Septum:cavity ratio                                         | 1.211         | 1.002     | 3.357         | 0.471-23.936       | 0.227            |
| Max wall thickness (mm)                                     | 0.043         | 0.026     | 1.044         | 0.992-1.099        | 0.097            |
| Left ventricle posterior wall(mm)                           | 0.034         | 0.047     | 1.035         | 0.944-1.135        | 0.469            |
| Left ventricle wall:cavity ratio                            | 1.241         | 1.004     | 3.457         | 0.483-24.727       | 0.217            |
| LVEDD (mm)                                                  | -0.029        | 0.018     | 0.972         | 0.938-1.007        | 0.117            |
| Ejection fraction (%)                                       | 0.848         | 0.861     | 2.336         | 0.433-12.612       | 0.324            |
| Left atrium diameter (mm)                                   | -0.014        | 0.017     | 0.986         | 0.954-1.019        | 0.397            |
| LVOT gradient (mmHg)                                        | 0.012         | 0.002     | 1.012         | 1.008-1.017        | <b>&lt;0.001</b> |
| LVOT gradient at rest ≥30 vs <30 (mm Hg)                    | 0.015         | 0.005     | 1.016         | 1.005-1.026        | <b>0.003</b>     |
| LVOT-gradient at rest ≥50 vs <50 (mmHg)                     | 0.015         | 0.005     | 1.016         | 1.005-1.026        | <b>0.002</b>     |
| Myectomy                                                    | 0.176         | 0.135     | 1.193         | 0.916-1.553        | 0.190            |
| Pacemaker therapy                                           | -0.054        | 1.07      | 0.948         | 0.769-1.169        | 0.617            |
| QTC (ms)                                                    | -0.002        | 0.004     | 0.998         | 0.990-1.007        | 0.669            |
| Beta-blocker dose mg/day                                    | -0.003        | 0.001     | 0.997         | 0.995-0.999        | <b>0.003</b>     |
| Verapamil/Diltiazem use Yes vs No                           | 0.983         | 0.254     | 2.672         | 1.625-4.394        | <b>&lt;0.001</b> |
| Verapamil/Diltiazem dose mg/day                             | 0.003         | 0.001     | 1.003         | 1.001-1.006        | <b>0.002</b>     |
| Amiodarone use Yes vs No                                    | -0.269        | 0.271     | 0.764         | 0.449-1.299        | 0.320            |
| Disopyramide use Yes vs No                                  | -0.539        | 0.394     | 0.587         | 0.269-1.264        | 0.172            |
| ACE-inhibitor use Yes vs No                                 | -0.085        | 0.126     | 0.919         | 0.575-1.468        | 0.723            |
| Spirolacton use Yes vs No                                   | 0.001         | 0.136     | 1.001         | 0.766-1.0307       | 0.995            |
| Statin treatment Yes vs No                                  | -0.962        | 0.371     | 0.382         | 0.185-0.791        | <b>0.010</b>     |
| Implantable Cardioverter Defibrillator (ICD)                | -1.511        | 0.592     | 0.221         | 0.069-0.704        | <b>0.011</b>     |
| <b>Multivariate Cox hazard analysis (98% complete data)</b> |               |           |               |                    |                  |
| Female sex                                                  | 1.131         | 0.284     | 3.099         | 1.777-5.406        | <b>&lt;0.001</b> |
| Age                                                         | 0.019         | 0.008     | 1.019         | 1.003-1.035        | <b>0.017</b>     |
| LVOT-gradient at rest ≥50 vs <50 (mmHg)                     | 0.052         | 0.015     | 1.053         | 1.023-1.083        | <b>&lt;0.001</b> |
| Max wall thickness (mm)                                     | 0.071         | 0.030     | 1.074         | 1.013-1.139        | <b>0.017</b>     |
| Beta-blocker dose mg/day                                    | <b>-0.004</b> | 0.001     | 0.996         | 0.993-0.999        | <b>0.008</b>     |

**Abbreviations:** NYHA=New York Heart Association Class, LVEDD=Left Ventricle end-diastolic diameter, LVOT=Left Ventricular outflow tract, ACE=angiotensin-converting-enzyme. Significant negative values of B suggest reduction in risk.

| <b>Supplementary Table S7: Characterization and comorbidity at diagnosis and at latest follow-up according to post-interventional daily beta-blocker dosage 25-99mg vs ≥100mg in interventional groups (n=108).</b> |                            |                          |                |
|---------------------------------------------------------------------------------------------------------------------------------------------------------------------------------------------------------------------|----------------------------|--------------------------|----------------|
|                                                                                                                                                                                                                     | <b>25-99 mg<br/>(n=24)</b> | <b>≥100mg<br/>(n=84)</b> | <b>P-value</b> |
| Female (%)                                                                                                                                                                                                          | 46                         | 49                       | 0.821(M/F)     |
| Male (%)                                                                                                                                                                                                            | 54                         | 51                       |                |
| Age at intervention (Mean±SD)                                                                                                                                                                                       | 56.0 (24.7)                | 54.1(20.0)               | 0.691          |
| NYHA class (Mean±SD)                                                                                                                                                                                                |                            |                          |                |
| Diagnosis                                                                                                                                                                                                           | 2.2 (0.75)                 | 2.1 (0.66)               | 0.699          |
| FU                                                                                                                                                                                                                  | 1.8 (0.61)                 | 1.7 (0.70)               | 0.590          |
| NYHA class ≥III (%)                                                                                                                                                                                                 |                            |                          |                |
| Diagnosis                                                                                                                                                                                                           | 46                         | 41                       | 0.647          |
| FU                                                                                                                                                                                                                  | 9                          | 9                        | 0.987          |
| LVOT mmHg (Median/IQR)                                                                                                                                                                                              |                            |                          |                |
| Diagnosis                                                                                                                                                                                                           | 67 (47)                    | 65 (66)                  | 0.952          |
| FU                                                                                                                                                                                                                  | 12 (31)                    | 13 (30)                  | 0.882          |
| LVOT ≥50 mmHg (%)                                                                                                                                                                                                   |                            |                          |                |
| Diagnosis                                                                                                                                                                                                           | 79                         | 69                       | 0.445          |
| FU                                                                                                                                                                                                                  | 25                         | 17                       | 0.356          |
| Max wall thickness, mm (Median/IQR)                                                                                                                                                                                 |                            |                          |                |
| Diagnosis                                                                                                                                                                                                           | 19 (8)                     | 20 (6)                   | 0.963          |
| FU                                                                                                                                                                                                                  | 17 (6)                     | 18 (6)                   | 0.833          |
| Body mass index (Median/IQR)                                                                                                                                                                                        |                            |                          |                |
| Diagnosis                                                                                                                                                                                                           | 26 (7)                     | 27 (6)                   | <b>0.024</b>   |
| FU                                                                                                                                                                                                                  | 25 (12)                    | 29 (7)                   | <b>0.026</b>   |
| Systemic hypertension (%)                                                                                                                                                                                           |                            |                          |                |
| Diagnosis                                                                                                                                                                                                           | 12.5                       | 8.3                      | 0.689          |
| FU                                                                                                                                                                                                                  | 37.5                       | 39.3                     | 1.000          |
| Atrial fibrillation (%)                                                                                                                                                                                             |                            |                          |                |
| Diagnosis                                                                                                                                                                                                           | 4.2                        | 2.4                      | 0.533          |
| FU                                                                                                                                                                                                                  | 29.2                       | 40.5                     | 0.351          |
| Statin treatment (%)                                                                                                                                                                                                |                            |                          |                |
| Diagnosis                                                                                                                                                                                                           | 4.2                        | 7.1                      | 1.000          |
| FU                                                                                                                                                                                                                  | 8.3                        | 19.0                     | 0.352          |
| Diabetes mellitus (%)                                                                                                                                                                                               |                            |                          |                |
| Diagnosis                                                                                                                                                                                                           | 16.7                       | 4.8                      | 0.071          |
| FU                                                                                                                                                                                                                  | 20.8                       | 16.7                     | 0.761          |
| Coronary artery disease (%)                                                                                                                                                                                         |                            |                          |                |
| Diagnosis                                                                                                                                                                                                           | 4.2                        | 4.8                      | 1.000          |
| FU                                                                                                                                                                                                                  | 25.0                       | 14.3                     | 0.225          |
| Chronic kidney disease (%)                                                                                                                                                                                          |                            |                          |                |
| Diagnosis                                                                                                                                                                                                           | 4.2                        | 1.2                      | 0.397          |
| FU                                                                                                                                                                                                                  | 8.3                        | 6.0                      | 0.650          |
| Chronic pulmonary obstructive disease (%)                                                                                                                                                                           |                            |                          |                |
| Diagnosis                                                                                                                                                                                                           | 0.0                        | 9.5                      | 0.195          |
| FU                                                                                                                                                                                                                  | 0.0                        | 11.9                     | 0.113          |

**Abbreviations:** IQR=interquartile range, NYHA=New York Heart Association Class. LVOT= Left Ventricular Outflow Tract, FU= follow up, P= Mann-Whitney/Chi-square/Fisher exact test used as appropriate.

**Supplementary Table S8. Characterization of co-morbidities in total cohort at diagnosis and at latest follow-up: comparison between survivors and disease-related (“cardiac”) and non-cardiac deaths. Values as median (IQR) unless otherwise specified**

|                                              | Survivors<br>(S)<br>(n=161) | Cardiac<br>deaths<br>(CD)<br>(n=65) | Non-<br>cardiac<br>deaths<br>(NCD)<br>(n=25) | P-value<br>S/CD,S/NCD,<br>CD/NCD |                   |
|----------------------------------------------|-----------------------------|-------------------------------------|----------------------------------------------|----------------------------------|-------------------|
|                                              |                             |                                     |                                              | Diagnosis                        | Follow-up<br>(FU) |
| Body mass index (Median+IQR)                 |                             |                                     |                                              | <b>0.024/</b>                    | <b>0.039/</b>     |
| Diagnosis                                    | 27 (6)                      | 25 (6)                              | 25 (5)                                       | 0.11/                            | FV/               |
| FU                                           | 27 (7)                      | 23 (8)                              | FV*                                          | 0.99                             | FV                |
| Systemic hypertension (%)                    |                             |                                     |                                              | 0.95/                            | 0.17/             |
| Diagnosis                                    | 14.3                        | 13.8                                | 8.0                                          | 0.54/                            | 0.65/             |
| FU                                           | 34.2                        | 44.6                                | 40.0                                         | 0.72                             | 0.81              |
| Statin therapy (%)                           |                             |                                     |                                              | 0.91/                            | <b>0.011/</b>     |
| Diagnosis                                    | 8.7                         | 9.2                                 | 4.0                                          | 0.75/                            | <b>0.011/</b>     |
| FU                                           | 26.1                        | 10.8                                | 4.0                                          | 0.81                             | 0.44              |
| Diabetes mellitus (%)                        |                             |                                     |                                              | 0.21/                            | 0.97/             |
| Diagnosis                                    | 3.7                         | 7.7                                 | 12.0                                         | 0.10/                            | 0.91/             |
| FU                                           | 13.7                        | 13.8                                | 12.0                                         | 0.68                             | 0.85              |
| Coronary artery disease (%)                  |                             |                                     |                                              | 0.11/                            | 0.06/             |
| Diagnosis                                    | 1.9                         | 6.2                                 | 8.0                                          | 0.13/                            | <b>0.031/</b>     |
| FU                                           | 9.3                         | 18.5                                | 24.0                                         | 0.67                             | 0.56              |
| Chronic kidney disease (%)                   |                             |                                     |                                              | 0.20/                            | 0.12/             |
| Diagnosis                                    | 0.6                         | 3.1                                 | 0.0                                          | 0.91/                            | 0.52/             |
| FU                                           | 2.5                         | 7.7                                 | 4.0                                          | 0.45                             | 0.65              |
| Chronic obstructive pulmonary<br>disease (%) |                             |                                     |                                              | 0.15/                            | 0.32/             |
| Diagnosis                                    | 4.3                         | 9.2                                 | 16.0                                         | 0.04/                            | 0.12/             |
| FU                                           | 6.8                         | 10.8                                | 16.0                                         | 0.46                             | 0.49              |

**Abbreviations:** Cardiac deaths= disease-related deaths, IQR=Interquartile Range, NYHA=New York Heart Association Class, \*FV= Few Values, P-values=Mann-Whitney/Chi-square/Fisher exact test used as appropriate.
